# Supplementary material for: An Efficient Preprocessing Algorithm for Image-based Plant Phenotyping
Source: Preprints.org preprint supplement (doi:10.20944/preprints201804.0209.v1), 2018-04-16
Supplement: Supplementary file 1 [file supplementary]

## Sheet: Sheet1
Fig. 4. Shows which binarization method has less destruction in plant shape by indicating how many connected components appears after binarization cause of leaves cut and other components
									times
		1	2	3	4	5	6	7	8	9	10	11	12	13	14	15	16
	Niblack	27	23	21	19	21	20	20	20	26	39	40	45	82	118	110	121
methods	Otsu	33	27	20	18	23	25	20	20	28	45	41	44	85	135	129	130
	Sauvola	44	41	33	20	30	68	34	22	23	66	77	89	111	189	150	190
	Bernsen	68	51	30	30	45	70	78	89	80	119	137	167	197	201	160	198
